# Supplementary material
Source: PubMed Central journal article supplement (PMC11114886)
Supplement: 18_2010_612_MOESM1_ESM.pdf [file 18_2010_612_MOESM1_ESM.pdf]

**SUPPLEMENTARY MATERIAL**

**Adenine nucleotides transporters in organelles: novel genes and functions**

**Javier Traba<sup>\*,1</sup>, Jorgina Satrústegui<sup>\*</sup> and Araceli del Arco<sup>†,\*</sup>**

**\* Departamento de Biología Molecular, Centro de Biología Molecular Severo Ochoa UAM-CSIC, CIBER de Enfermedades Raras (CIBERER), Universidad Autónoma de Madrid, Madrid, Spain.**

**† Área de Bioquímica, Centro Regional de Investigaciones Biomédicas (CRIB), Facultad de Ciencias del Medio Ambiente, Universidad de Castilla-La Mancha, Toledo, Spain.**

**1 Correspondence to:**

**Javier Traba; Tel: 034-911964651; Fax: 034-911964420; E-mail: [jtraba@cbm.uam.es](mailto:jtraba@cbm.uam.es)**

## 1) AAC in *Saccharomyces cerevisiae* (Table S1)

The ADP/ATP carrier in yeast exchanges ADP<sup>3-</sup> with ATP<sup>4-</sup> between the cytosol and mitochondrial matrix. It is thus essential for oxidative phosphorylation, but it is also essential for anaerobic growth (see below).

### Expression

AAC2 is the main isoform and the only one which is detectable in growing yeast. The expression of AAC1 and AAC3 is very low and can not be detected by western blot [40]. AAC3 is expressed at low levels and only in anaerobiosis (Sabova et al., 1993).

AAC2 expression is modulated by carbon source and oxygen availability. It is preferentially expressed with respiratory (non-fermentable) carbon sources and in aerobiosis. The expression of AAC2 requires the HAP2/3/4 complex and heme (Betina et al, 1995).

AAC3 expression is also modulated by carbon source and oxygen availability. It is preferentially expressed with glucose and in anaerobiosis. Repression by oxygen is mediated by heme and the heme-dependent repressor factor ROX1 (Sabová et al, 1993). Repression by respiratory carbon sources is mediated by RAP1, a ubiquitous transcriptional regulator, and by ERA (ethanol-repression sequence) *cis*-acting elements (Sokolíková et al, 2000).

AAC1 expression is positively regulated by oxygen in a heme-independent manner. Unlike AAC2 and AAC3, it is independent of carbon source (Gavurníková et al, 1996).

### Disruption mutants

The *aac1* mutant shows no phenotype. It is able to grow on respiratory (non-fermentable) carbon sources at a normal rate. The *aac2* mutant is unable to grow on respiratory carbon sources, but it is able to grow on glucose in aerobiosis and anaerobiosis. It is unable to lose mitochondrial DNA (i.e. it becomes petite-negative). The *aac3* mutant shows no phenotype, as the *aac1* mutant (Kolarov et al, 1990).

The *aac1,3* double mutant is identical to the single *aac1* or *aac3* mutants and shows no phenotype [40]. The *aac1,2* double mutant is identical to the single *aac2* mutant. The *aac2,3* double mutant is unable to grow on respiratory carbon sources as the *aac2* mutant, but in addition, it is unable to grow in anaerobiosis (Kolarov et al, 1990). The *aac1,2,3* triple mutant is identical to the *aac2,3* mutant [40].

The *aac1* mutant in combination with the *ade2* mutation shows a red colony phenotype, which suggests that Aac1p could be involved somehow in vacuolar metabolism (Drgon et al, 1992).

## ADP/ATP exchange between mitochondria and cytosol

Mitochondria normally function in ATP production by oxidative phosphorylation. During respiratory growth the ATP produced in the mitochondria is exported to the cytosol in exchange for ADP (fig. S2A). The AAC is thus essential for growth in respiratory carbon sources.

However, during anaerobic growth or in  $\rho^0$  cells (i.e.: cells lacking mitochondrial DNA, which encodes subunits of the respiratory complexes and subunits of the  $F_0F_1$ -ATP synthase) respiration is not possible and mitochondria switch to ATP consumers. In these conditions ATP is utilized to build up a mitochondrial membrane potential and for the import and assembly of mitochondrial proteins. The AAC is essential for anaerobic growth or in  $\rho^0$  cells, because the generation of a mitochondrial membrane potential depends on electrogenic exchange of cytosolic  $ATP^{4-}$  for mitochondrial  $ADP^{3-}$  coupled either to  $H^+$ -pumping through the  $F_0F_1$ -ATP synthase (in anaerobiosis, fig. S2B) or only to ATP hydrolysis by  $F_1$ -ATPase (in  $\rho^0$  cells, fig. S2C).

In yeast cells growing aerobically on glucose the transcription of genes coding for mitochondrial proteins is repressed, and the contribution of respiration to glucose catabolism and energetics is very small. It has been proposed that the mitochondria would be ATP consumers also in this condition (Francis et al., 2007; [11,33]), importing ATP from the cytosol and hydrolyzing it through the  $F_0F_1$ -ATP synthase as in anaerobiosis (fig. S2B).

### **Function of the AAC isoforms**

All three isoforms of the ADP/ATP carrier are able to perform  $ADP_{in}/ATP_{out}$  exchange, and are able to support respiratory growth when expressed at high levels from expression vectors. Their translocation properties are similar to those of Aac2p (Drgon et al, 1992). However, in growing yeast, the expression of *AAC1* and *AAC3* is negligible and can not be detected by western blot [40]. Thus, Aac2p is the main isoform of the ADP/ATP carrier, and is the only one which participates in respiratory growth and oxidative phosphorylation. It is also able to catalyse the inverse exchange (cytosolic ATP for mitochondrial ADP) in anaerobiosis, because the *aac1,3* mutant, in which Aac2p is the only ADP/ATP carrier, is still able to perform anaerobic growth [40].

Endogenous Aac3p and Aacp1 do not participate in respiratory growth or oxidative phosphorylation, because the *aac2* mutant is unable to grow in respiratory carbon sources. The *aac1,2* mutant, in which Aac3p is the only ADP/ATP carrier, is able to grow in anaerobiosis (Kolarov et al, 1990), and thus Aac3p is able to catalyse the inverse exchange (cytosolic ATP for mitochondrial ADP), even though its endogenous expression is very low. This suggests that the requirement of ATP import to support anaerobic growth is not as demanding as ATP export to support respiration.

### **Role of AAC on yeast apoptosis**

Apoptosis-like yeast cell death has many features in common with mammalian apoptosis. In the mitochondrial pathway the outer mitochondrial membrane permeabilization and release of proapoptotic proteins from the intermembrane space are crucial for death. Many of the proapoptotic proteins released are conserved from yeast to human, including cytochrome c, and AIF. The nature of the pore that releases these proteins is still unknown, both in yeast and in mammalian cells, however, and the identity of the proteins involved in its formation is highly controversial.

In yeast cells, unlike mammalian cells, the ADP/ATP carrier, but not its catalytic activity, was found to be required for mitochondrial outer membrane permeabilization and cytochrome c release in some forms of apoptosis (Pereira et al, 2007).

### **AAC in other yeast**

*Candida parolopsis*: in this aerobic yeast there is only one AAC gene, *CpAAC1* (Neboháková et al, 1999). *CpAAC1* is able to complement *aac2,3 Saccharomyces cerevisiae*, both in respiratory growth and in anaerobic growth on glucose, suggesting that the protein is able to transport ATP in both directions. However, *Candida parolopsis* is a strict aerobic species with a low fermentative capacity. The expression of *CpAAC1* is strongly reduced in cells grown in glucose (in aerobic and semianaerobic conditions) and enhanced in non-fermentable sources.

*Schizosaccharomyces pombe*: in this aerobic, fermentative, petite-negative yeast there is only one AAC gene, *SpANCI* (Trézéguet et al, 1999). The expression of *SpANCI* is reduced in cells grown in low or high concentrations of glucose, even further reduced by semianaerobic conditions and enhanced in non-fermentable sources. Deletion of *SpANCI* yields viable cells, although *Schizosaccharomyces pombe* is a petite-negative yeast species (unable to lose mitochondrial DNA). However, growth is retarded in raffinose and prevented in respiratory carbon sources and in glucose in semianaerobiosis.

*Kluyveromyces lactis*: in this aerobic, respiratory, petite-negative yeast there is only one AAC gene, *KIAAC* (Trézéguet et al, 1999). The expression of *KIAAC* is reduced in cells grown in glucose, even further reduced by semianaerobic conditions and enhanced in non-fermentable sources. Deletion of *KIAAC* is lethal in some strains, but in others yields viable cells only in glucose, but not in galactose, raffinose, maltose or respiratory carbon sources. Semianaerobic growth in glucose is also severely impaired. *AAC1*, *AAC2* and *AAC3* from *Saccharomyces cerevisiae* are able to complement the mutation, but none of them confer upon *Kluyveromyces lactis* the ability to grow under strict anaerobic conditions (Fontanesi et al, 2006). *KIAAC* from *Kluyveromyces lactis* can complement the petite-negative phenotype of *aac2 Saccharomyces cerevisiae* mutant as well as its inability to grow on nonfermentable carbon sources.

*Yarrowia lipolytica*: in this aerobic, dimorphic yeast there are three genes, *YIAAC1*, *YIAAC2* and *YIAAC3* (Mentel et al, 2005). *YIAAC1* is repressed in low oxygen, whereas *YIAAC3* is slightly stimulated and *YIAAC2* is unaffected. The expression of the AAC is identical in fermentable and respiratory carbon sources, probably because in this yeast there is no glucose repression. *Yarrowia lipolytica* is able to use proteins and peptides as carbon sources, and these sources produced a moderate repression of all three genes.

## 2) AAC in mammals (Table S2)

### Expression

ANT1 is expressed mainly in heart and skeletal muscle. ANT2 is only expressed very weakly in the main tissues and abundantly in highly proliferative cells. The expression of ANT2 is regulated by Sp1 and the GRBOX (glycolysis regulated box) promoter sequence, a sequence which is homologous to a yeast *AAC3* promoter sequence (Giraud et al, 1998). ANT3 is expressed ubiquitously at a level depending on the respiratory activity of the tissues. ANT4 is expressed mainly in testis, and at lower levels in liver and brain (Dolce et al, 2005).

Mouse Ant1 is expressed at high levels in skeletal muscle and heart, similarly to human ANT1 (Levy et al, 2000). Mouse Ant2 is strongly expressed in all tissues but muscle, in marked contrast to human ANT2 (Levy et al, 2000). Mouse Ant4 is expressed mainly in testis.

### Function of the AAC in mammalian cells

During respiratory growth the ATP produced in the mitochondria is exported to the cytosol in exchange for ADP. ANT1 and ANT3 appear to be the main isoforms involved in respiration and oxidative phosphorylation and export ATP produced in the mitochondrial matrix to the cytosol (fig. S2A).

However, in  $\rho^0$  cells or in cells with mutations in key respiratory genes respiration is not possible and mitochondria switch to ATP consumers, as in yeast. The AAC is essential for growth in this conditions, because the generation of a mitochondrial membrane potential depends on electrogenic exchange of cytosolic  $\text{ATP}^{4-}$  for mitochondrial  $\text{ADP}^{3-}$  coupled either to  $\text{H}^+$ -pumping through the  $\text{F}_0\text{F}_1$ -ATP synthase (fig. S2B) or only to ATP hydrolysis by  $\text{F}_1$ -ATPase in  $\rho^0$  cells (fig. S2C). Interestingly, mammalian  $\rho^0$  cells become auxotrophs for uridine, as *de novo* synthesis of pyrimidines requires the regeneration of ubiquinone by the respiratory chain (Perales-Clemente et al., 2008). ANT2 is overexpressed in  $\rho^0$  cells and in cells with mutations in mitochondrial DNA (Loiseau et al, 2002; Bonod-Binaud et al, 2001) and is the isoform proposed for the inverse exchange (cytosolic ATP for mitochondrial ADP). The capacity of

ANT2 to catalyse the inverse exchange was confirmed because it is able to support growth in anaerobiosis in the *aac1,2,3* yeast mutant (Giraud et al, 1998).

Many cancers and cell lines have a reduced mitochondrial function and rely mainly on glycolysis to generate ATP. It has been proposed that in these cells the mitochondria are ATP consumers, importing ATP from the cytosol and hydrolyzing it through the F<sub>0</sub>F<sub>1</sub>-ATP synthase (fig. S2B). Indeed, ANT2 is overexpressed in glycolytic cell lines and cancers (Chevrollier et al, 2005).

### **Role of AAC on the mitochondrial permeability transition**

The mitochondrial permeability transition pore (PTP) is a non-specific pore that is formed in the inner mitochondrial membrane under conditions of calcium overload and/or oxidative stress. Its molecular composition is still debated (Leung and Halestrap, 2008), but it is implicated in necrotic cell death, for example, in situations of ischemia-reperfusion (Baines et al., 2005; Nakagawa et al., 2005; Schinzel et al., 2005). The ADP/ATP was thought to be a component of the PTP, along with the voltage-dependent anion channel (VDAC), members of the pro- and anti-apoptotic BAX-BCL2 protein family and cyclophilin D. Accordingly, the pore is regulated by AAC inhibitors and CyP-D inhibitors. Interestingly, the two AAC inhibitors have opposite effects on permeability transition, as CAT, which fixes the carrier in the *c* conformation, stimulates it, and BKA, which fixes the carrier in the *m* conformation, inhibits it.

However, liver mitochondria lacking ANT1 and ANT2 could still be induced to undergo permeability transition (Kokoszka et al, 2004), but more Ca<sup>2+</sup> was required to activate it, and the pore became insensitive to AAC substrates (ADP) or inhibitors (CAT and BKA). Therefore, the ADP/ATP carriers should be now considered as PTP regulators, but not as key components. It has been proposed that, since the AAC is the most abundant protein in the inner mitochondrial membrane, its conformation is likely to affect the inner membrane properties. The *m* conformation (triggered by ADP or BKA) would be protective, while the *c* conformation (triggered by CAT) would stimulate PTP opening.

### **Knock out mice**

Ant1-deficient mice exhibit many of the hallmarks of human oxidative phosphorylation (OXPHOS) disease (Graham et al, 1997). Histological and ultrastructural examination of skeletal muscle from these mutants revealed ragged-red muscle fibers and a dramatic proliferation of mitochondria, while examination of the heart revealed cardiac hypertrophy with mitochondrial proliferation. Mitochondria isolated from mutant skeletal muscle exhibited a severe defect in coupled respiration. Ant1 mutant adults also had a resting serum lactate level fourfold higher than that of controls, indicative of metabolic acidosis. Significantly, mutant adults manifested severe exercise intolerance. Therefore, Ant1 mutant mice have the

biochemical, histological, metabolic and physiological characteristics of mitochondrial myopathy and cardiomyopathy. On the other hand, Ant1-deficient mice are more resistant to excitotoxic insults (Lee et al., 2009), which agrees with the fact that the absence of AAC desensitizes the PTP to  $\text{Ca}^{2+}$  (see above).

Ant4-deficient male mice were infertile (Brower et al, 2007), probably because meiosis in male germ cells is arrested (Brower et al, 2009). A significant reduction in testicular size was also observed without any other distinguishable abnormalities.

### **AAC in disease**

Mitochondrial disorders of oxidative phosphorylation (OXPHOS) comprise several diseases that can be caused by mutations in nuclear and mitochondrial genes. Many of them are also characterized by deletions in mitochondrial DNA, and involve muscle, eye, heart and brain pathology. Gain of function mutations in ANT1 have been reported to cause autosomal dominant progressive external ophthalmoplegia (adPEO). These mutations produce a leak of protons through the AAC protein (it becomes an unregulated channel) and thus uncouple the inner mitochondrial membrane and decrease the mitochondrial membrane potential. This produces severe defects in mitochondrial biogenesis, which secondarily cause mtDNA instability (Wang et al., 2008).

A single patient with a loss of function mutation in ANT1 has been found (Palmieri et al., 2005). It presented with hypertrophic cardiomyopathy, mild myopathy with exercise intolerance and lactic acidosis. A muscle biopsy showed the presence of numerous ragged-red fibers. Thus, the phenotype of the patient resembles that of Ant1-deficient mice.

ANT2 is highly expressed in proliferative cells and its induction has been found in many human cancers, particularly breast cancer. Knock-down of ANT2 by siRNA has been shown to induce apoptosis and inhibit tumor growth in vivo and in vitro (Jang et al., 2008a). On the other hand, overexpression of ANT1 induces apoptosis and inhibits tumor growth in vivo (Jang et al., 2008b), and this suggests that the different ANT isoforms have different roles in apoptosis. ANT1 and ANT3 function as pro-apoptotic, while ANT2 and ANT4 are anti-apoptotic (Gallerne et al., 2010).

### **SUPPLEMENTARY REFERENCES**

Baines, C.P., Kaiser, R.A., Purcell, N.H., Blair, N.S., Osinska, H., Hambleton, M.A., Brunskill, E.W., Sayen, M.R., Gottlieb, R.A., Dorn, G.W., Robbins, J. and Molkentin, J.D. (2005) Loss of cyclophilin D reveals a critical role for mitochondrial permeability transition in cell death. *Nature* 434, 658-662.

- Betina, S., Gavurníková, G., Haviernik, P., Sabová, L. and Kolarov J. (1995) Expression of the AAC2 gene encoding the major mitochondrial ADP/ATP carrier in *Saccharomyces cerevisiae* is controlled at the transcriptional level by oxygen, heme and HAP2 factor. *Eur J Biochem* 229, 651-657.
- Bonod-Bidaud, C., Chevrollier, A., Bourasseau, I., Lachaux, A., Mousson de Camaret, B. and Stepien, G. (2001) Induction of ANT2 gene expression in liver of patients with mitochondrial DNA depletion. *Mitochondrion* 1, 217-224.
- Brower, J.V., Rodic, N., Seki, T., Jorgensen, M., Fliess, N., Yachnis, A.T., McCarrey, J.R., Oh, S.P. and Terada, N. (2007) Evolutionarily conserved mammalian adenine nucleotide translocase 4 is essential for spermatogenesis. *J. Biol. Chem.* 282, 29658-29666.
- Chevrollier, A., Loiseau, D., Chabi, B., Renier, G., Douay, O., Malthiery, Y. and Stepien, G. (2005) ANT2 isoform required for cancer cell glycolysis. *J Bioenergetics Biomembranes* 37: 307-316
- Dolce, V., Scarcia, P., Iacopetta, D. and Palmieri, F. (2005) A fourth ADP/ATP carrier isoform in man: identification, bacterial expression, functional characterization and tissue distribution. *FEBS Lett.* 579, 633-637.
- Drgon, T., Sabová, L., Gavurníková, G., Kolarov, J. (1992) Yeast ADP/ATP carrier (AAC) proteins exhibit similar enzymatic properties but their deletion produces different phenotypes. *FEBS Lett* 304, 277-280.
- Francis, B.R., White, K.H. and Thorsness, P.E. (2007) Mutations in the Atp1p and Atp3p subunits of yeast ATP synthase differentially affect respiration and fermentation in *Saccharomyces cerevisiae*. *J. Bioenerg. Biomembr.* 39, 127-144.
- Fontanesi, F., Viola, A.M. and Ferrero, I. (2006) Heterologous complementation of the *Klaac* null mutation of *Kluyveromyces lactis* by the *Saccharomyces cerevisiae* AAC3 gene encoding the ADP/ATP carrier. *FEMS Yeast Res* 6, 414-420.
- Gallerne, C., Touat, Z., Chen, Z.X., Martel, C., Mayola, E., Sharaf El Dein, O., Buron, N., Le Bras, M., Jacotot, E., Borgne-Sanchez, A., Lemoine, A., Lemaire, C., Pervaiz, S. and Brenner, C. (2010) The fourth isoform of the adenine nucleotide translocator inhibits mitochondrial apoptosis in cancer cells. *Int J Biochem Cell Biol* 42, 623-629.
- Gavurníková, G., Sabova, L., Kissová, I., Haviernik, P. and Kolarov, J. (1996) Transcription of the AAC1 gene encoding an isoform of mitochondrial ADP/ATP carrier in *Saccharomyces cerevisiae* is regulated by oxygen in a heme-independent manner. *Eur J Biochem* 239, 759-763.
- Giraud, S., Bonod-Bidaud, C., Wesolowski-Louvel, M. and Stepien, G. (1998) Expression of human ANT2 gene in highly proliferative cells: GRBOX, a new transcriptional element, is involved in the regulation of glycolytic ATP import into mitochondria. *J Mol Biol* 281, 409-418



- Graham, B.H., Waymire, K.G., Cottrell, B., Trounce, I.A., MacGregor, G.R. and Wallace, D.C. (1997) A mouse model for mitochondrial myopathy and cardiomyopathy resulting from a deficiency in the heart/muscle isoform of the adenine nucleotide translocator. *Nat Genet* 16, 226-234.
- Jang, J.Y., Choi, Y., Jeon, Y.K. and Kim, C.W. (2008a) Suppression of adenine nucleotide translocase-2 by vector-based siRNA in human breast cancer cells induces apoptosis and inhibits tumor growth in vitro and in vivo. *Breast Cancer Res* 10, R11.
- Jang, J.Y., Choi, Y., Jeon, Y.K., Aung, K.C. and Kim, C.W. (2008b) Over-expression of adenine nucleotide translocase 1 (ANT1) induces apoptosis and tumor regression in vivo. *BMC Cancer* 8, 160.
- Kokoszka, J.E., Waymire, K.G., Levy, S.E., Sligh, J.E., Cai, J., Jones, D.P., MacGregor, G.R. and Wallace, D.C. (2004) The ADP/ATP translocator is not essential for the mitochondrial permeability transition pore. *Nature*. 427, 461-465.
- Kolarov, J., Kolarova, N. and Nelson, N. (1990) A third ADP/ATP translocator gene in yeast. *J Biol Chem* 265, 12711-12716.
- Lee, J., Schriener, S.E. and Wallace, D.C. (2009) Adenine nucleotide translocator 1 deficiency increases resistance of mouse brain and neurons to excitotoxic insults. *Biochim Biophys Acta* 1787, 364-370.
- Leung, A.W. and Halestrap, A.P. (2008) Recent progress in elucidating the molecular mechanism of the mitochondrial permeability transition pore. *Biochim Biophys Acta* 1777, 946-952.
- Levy, S.E., Chen, Y.S., Graham, B.H. and Wallace, D.C. (2000) Expression and sequence analysis of the mouse adenine nucleotide translocase 1 and 2 genes. *Gene* 254, 57-66.
- Loiseau, D., Chevrollier, A., Douay, O., Vavasseur, F., Renier, G., Reynier, P., Malthiery, Y. and Stepien, G. (2002) Oxygen consumption and expression of the adenine nucleotide translocator in cells lacking mitochondrial DNA. *Exp Cell Res* 278, 12-18.
- Mentel, M., Piskur, J., Neuvéglise, C., Rycovská, A., Cellengová, G. and Kolarov, J. (2005) Triplicate genes for mitochondrial ADP/ATP carriers in the aerobic yeast *Yarrowia lipolytica* are regulated differentially in the absence of oxygen. *Mol Genet Genomics* 273, 84-91.
- Nakagawa, T., Shimizu, S., Watanabe, T., Yamaguchi, O., Otsu, K., Yamagata, H., Inohara, H., Kubo, T. and Tsujimoto, Y. (2005) Cyclophilin D-dependent mitochondrial permeability transition regulates some necrotic but not apoptotic cell death. *Nature* 434, 652-658.
- Neboháčová, M., Mentel, M., Nosek, J. and Kolarov, J. (1999) Isolation and expression of the gene encoding mitochondrial ADP/ATP carrier (AAC) from the pathogenic yeast *Candida parapsilosis*. *Yeast* 15, 1237-1242.

- Palmieri, L., Alberio, S., Pisano, I., Lodi, T., Meznaric-Petrusa, M., Zidar, J., Santoro, A., Scarcia, P., Fontanesi, F., Lamantea, E., Ferrero, I. and Zeviani, M. (2005) Complete loss-of-function of the heart/muscle-specific adenine nucleotide translocator is associated with mitochondrial myopathy and cardiomyopathy. *Hum Mol Genet* 14, 3079-3088.
- Perales-Clemente, E., Bayona-Bafaluy, M.P., Pérez-Martos, A., Barrientos, A., Fernández-Silva, P. and Enriquez, J.A. (2008) Restoration of electron transport without proton pumping in mammalian mitochondria. *Proc Natl Acad Sci USA* 105, 18735-18739.
- Pereira, C., Camougrand, N., Manon, S., Sousa, M.J. and Côte-Real, M. (2007) ADP/ATP carrier is required for mitochondrial outer membrane permeabilization and cytochrome c release in yeast apoptosis. *Mol Microbiol* 66, 571-582.
- Sabová, L., Zeman, I., Supek, F. and Kolarov, J. (1993) Transcriptional control of AAC3 gene encoding mitochondrial ADP/ATP translocator in *Saccharomyces cerevisiae* by oxygen, heme and ROX1 factor. *Eur. J. Biochem.* 213, 547-553.
- Schinzl, A.C., Takeuchi, O., Huang, Z., Fisher, J.K., Zhou, Z., Rubens, J., Hetz, C., Danial, N.N., Moskowitz, M.A. and Korsmeyer, S.J. (2005) Cyclophilin D is a component of mitochondrial permeability transition and mediates neuronal cell death after focal cerebral ischemia. *Proc Natl Acad Sci USA* 102, 12005-12010.
- Sokolíková, B., Sabová, L., Kissová, I. and Kolarov, J. (2000) A carbon-source-responsive element is required for regulation of the hypoxic ADP/ATP carrier (AAC3) isoform in *Saccharomyces cerevisiae*. *Biochem J* 352, 893-898.
- Trézéguet, V., Zeman, I., David, C., Lauquin, G.J. and Kolarov, J. (1999) Expression of the ADP/ATP carrier encoding genes in aerobic yeasts; phenotype of an ADP/ATP carrier deletion mutant of *Schizosaccharomyces pombe*. *Biochim Biophys Acta* 1410, 229-236.
- Wang, X., Salinas, K., Zuo, X., Kucejova, B. and Chen, XJ. (2008) Dominant membrane uncoupling by mutant adenine nucleotide translocase in mitochondrial diseases. *Hum Mol Genet* 17, 4036-4044.

## SUPPLEMENTARY FIGURE LEGENDS

**Figure S1. Consensus cladogram of eukaryotes.** The 5 major eukaryotic groups and taxa belonging to their subgroups are shown. Model organisms mentioned in the main text are in bold. In organisms that lack mitochondria *Hy* indicates that the organism contains hydrogenosomes, *Mt* indicates that it contains mitosomes and *aM* indicates that it contains anaerobic mitochondria. Amitochondriate organisms mentioned in the main text are underlined. They are scattered along the different major groups, and thus mitosomes and hydrogenosomes have probably arisen independently several times during evolution, as a result of movement of different organisms into anaerobic habitats. Adapted from [12].

**Figure S2. Generation of a mitochondrial membrane potential in eukaryotic cells.** **A)** Yeast cells growing in respiratory (non-fermentable) carbon sources, normal mammalian cells and procyclic form trypanosomes generate a membrane potential ( $\Delta\Psi$ ) by proton pumping in the electron transport chain (ETC), and synthesize ATP by the  $F_0F_1$   $H^+$ -ATP synthase. Then, the ATP is exported to the cytosol by the ADP/ATP carrier (AAC) in exchange for ADP. **B)** Yeast cells growing in fermentable carbon sources in aerobiosis or anaerobiosis, some tumour cells, mammalian cells growing in anaerobiosis or bloodstream from trypanosomes generate a  $\Delta\Psi$  by the electrogenic exchange of cytosolic ATP (with four negative charges) for mitochondrial ADP (with three negative charges) through the AAC. The  $F_0F_1$   $H^+$ -ATP synthase works to hydrolyze ATP, and this is coupled to proton pumping, which also contributes to the generation of  $\Delta\Psi$ . **C)** In cells lacking mitochondrial DNA such as  $\rho^0$  yeast,  $\rho^0$  mammalian cells, dyskinetoplastic trypanosomes and perhaps also in some apicomplexan parasites with a simplified mitochondrial DNA, the ETC and the  $F_0$  fragment of the  $F_0F_1$   $H^+$ -ATP synthase, partially encoded by the mitochondrial DNA, are not functional and thus, the  $\Delta\Psi$  is only generated by the AAC. ATP hydrolysis by the  $F_1$  ATPase is essential to maintain an ADP concentration high enough for a sufficient rate of electrogenic adenine nucleotide translocation in the AAC.

**Table S1. ADP/ATP carriers (AACs) in yeast.**

**Table S2. ADP/ATP carriers (AACs) in mammals.**

**Table S3. Accession numbers of the listed proteins.** Proteins in red do not belong to the mitochondrial carrier family.

**Fig S1**

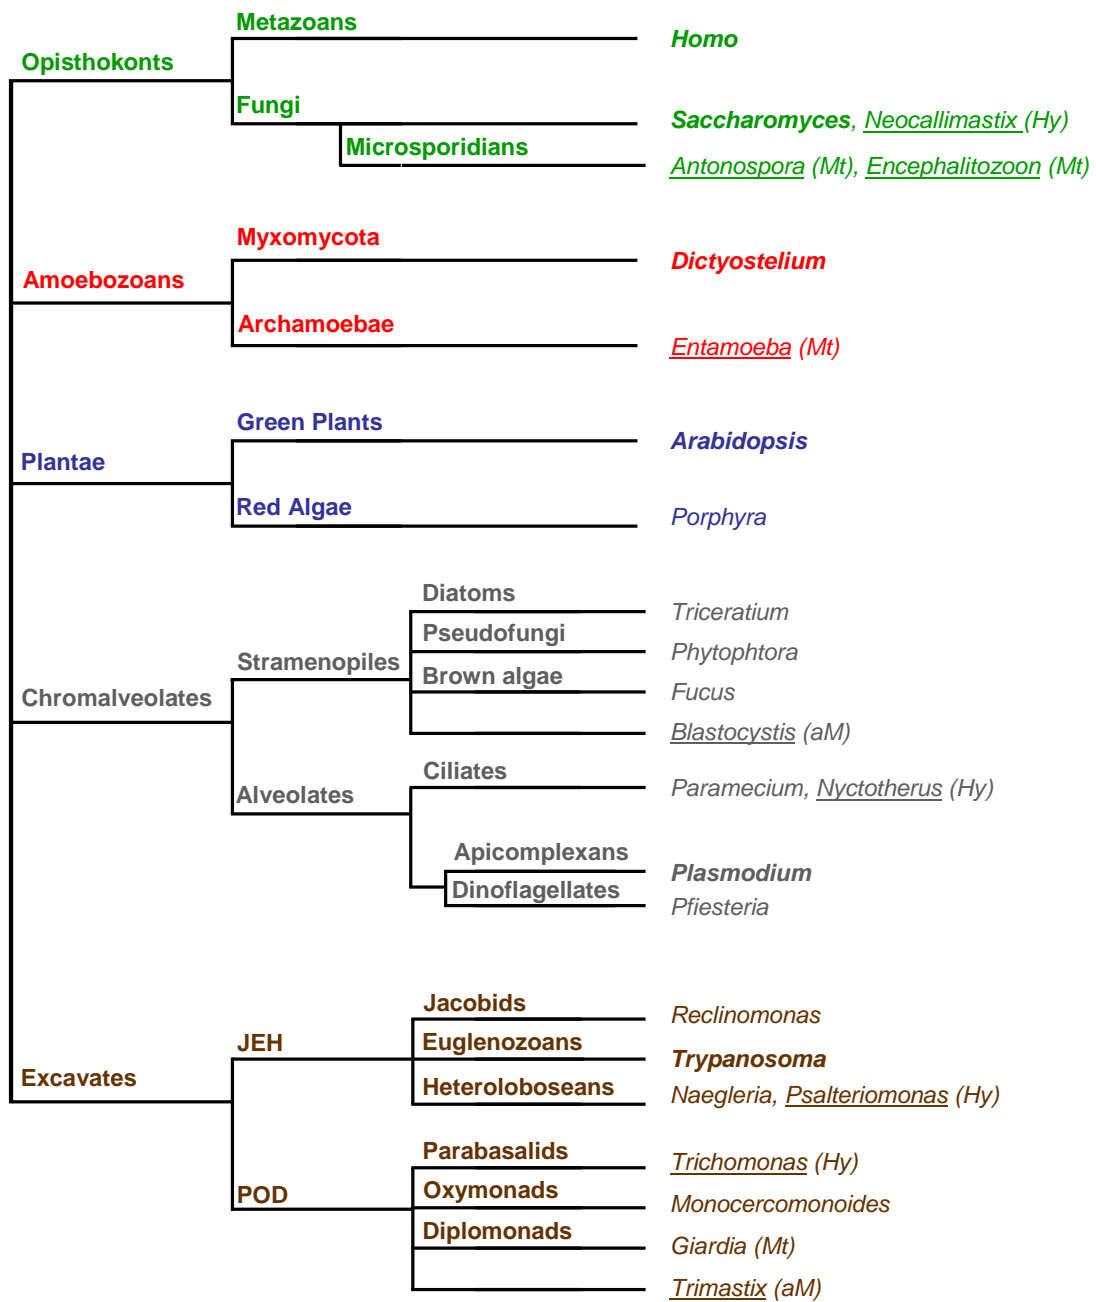



| Gene        | Expression                        | Regulation                                                            | Disruption mutant                                                                                                                                    | Disruption mutant in combination with an <i>aac2</i> disruption    | Proposed function                                                                                    |
|-------------|-----------------------------------|-----------------------------------------------------------------------|------------------------------------------------------------------------------------------------------------------------------------------------------|--------------------------------------------------------------------|------------------------------------------------------------------------------------------------------|
| <b>AAC1</b> | Very low.<br>Undetectable         | Positively regulated by oxygen.<br>Independent of carbon source       | No phenotype                                                                                                                                         | As the <i>aac2</i> mutant                                          | ?                                                                                                    |
| <b>AAC2</b> | High.<br>Detectable               | Preferentially expressed in aerobiosis and respiratory carbon sources | Unable to grow on respiratory carbon sources.<br>Unable to live without mitochondrial DNA.<br>Able to grow on glucose in aerobiosis and anaerobiosis | -----                                                              | Forward exchange in respiratory growth.<br>Inverse exchange in fermentative growth and anaerobiosis. |
| <b>AAC3</b> | Very low and only in anaerobiosis | Preferentially expressed in anaerobiosis and glucose                  | No phenotype                                                                                                                                         | As the <i>aac2</i> mutant, but also unable to grow in anaerobiosis | Reverse exchange in anaerobiosis to generate $\Delta\Psi$                                            |

**Table S1. ADP/ATP carriers (AACs) in yeast**

| Gene | Expression in humans      | Expression in rodents     | Effect in apoptosis | Phenotype of KO mice                             | Diseases                                                                                               |
|------|---------------------------|---------------------------|---------------------|--------------------------------------------------|--------------------------------------------------------------------------------------------------------|
| ANT1 | Skeletal muscle and heart | Skeletal muscle and heart | Pro-apoptotic       | Myopathy and cardiomyopathy                      | Gain of function mutations cause adPEO<br>Loss of function mutations cause myopathy and cardiomyopathy |
| ANT2 | Proliferative cells       | Ubiquitous                | Anti-apoptotic      | -----                                            | Overexpressed in tumors and cells with mutations in mitochondrial DNA                                  |
| ANT3 | Ubiquitous                | Absent                    | Pro-apoptotic       | -----                                            | -----                                                                                                  |
| ANT4 | Testis                    | Testis                    | Anti-apoptotic      | Infertile males.<br>Reduction in testicular size | -----                                                                                                  |

**Table S2. ADP/ATP carriers (AACs) in mammals**

| Species                       | Function          | Carrier     | Protein name     | Acc. Number    |
|-------------------------------|-------------------|-------------|------------------|----------------|
| <i>H. sapiens</i>             | ADP/ATP carrier   | SLC25A4     | ANT1             | NP_001142.2    |
|                               |                   | SLC25A5     | ANT2             | NP_001143.2    |
|                               |                   | SLC25A6     | ANT3             | NP_001627.2    |
|                               |                   | SLC25A31    | ANT4             | NP_112581.1    |
|                               | ATP-Mg/Pi carrier | SLC25A23    | SCaMC-3a (APC-2) | NP_077008.2    |
|                               |                   |             | SLC25A24         | SCaMC-1        |
|                               |                   | SLC25A25    | SCaMC-1a (APC-1) | NP_998816.1    |
|                               |                   |             | SCaMC-2a (APC-3) | NP_443133.2    |
|                               |                   |             | SCaMC-2b         | NP_001006642.1 |
|                               |                   |             | SCaMC-2c         | NP_001006643.1 |
|                               | SLC25A41          | SCaMC-2d    | NP_001006644.1   |                |
|                               |                   | SCaMC-3like | NP_775908.2      |                |
|                               | CoA carrier       | SLC25A16    | GDC              | NP_689920.1    |
| SLC25A42                      |                   |             | NP_848621.2      |                |
| Peroxisomal AMP/ATP carrier   | SLC25A17          | PMP34       | NP_006349.1      |                |
| Putative nucleotide uniporter | SLC25A43          |             | NP_660348.2      |                |
| Vesicular nucleotide carrier  | SLC17A9           | VNUT        | NP_071365.3      |                |

| Species                     | Function          | ORF     | Protein name | Acc. Number |
|-----------------------------|-------------------|---------|--------------|-------------|
| <i>S. cerevisiae</i>        | ADP /ATP carrier  | YMR056c | Aac1p        | NP_013772.1 |
|                             |                   | YBL030c | Aac2p        | NP_009523.1 |
|                             |                   | YBR085w | Aac3p        | NP_009642.1 |
|                             | ATP-Mg/Pi carrier | YNL083w | Sal1p        | CAY82520.1  |
|                             | CoA carrier       | YHR002w | Leu5p        | NP_011865.1 |
|                             | Unknown           | YPR011c | Ypr011c      | NP_015336.1 |
| Peroxisomal AMP/ATP carrier | YPR128c           | Ant1p   | NP_015453.1  |             |

**Table S3. Accession numbers of the listed proteins.** Proteins in red do not belong to the mitochondrial carrier family



| Species             | Function                    | Locus     | Protein name | Acc. Number |
|---------------------|-----------------------------|-----------|--------------|-------------|
| <i>A. thaliana</i>  | ADP/ATP carrier             | At3g08580 | AAC1         | NP_850541.1 |
|                     |                             | At5g13490 | AAC2         | NP_196853.1 |
|                     |                             | At4g28390 | AAC3         | NP_194568.1 |
|                     | ATP-Mg/Pi carrier           | At5g61810 |              | NP_568940.1 |
|                     |                             | At5g07320 |              | NP_196349.1 |
|                     |                             | At5g51050 |              | NP_199918.1 |
|                     | CoA carrier                 | At4g26180 |              | NP_194348.1 |
|                     |                             | At1g14560 |              | NP_172908.1 |
|                     | AMP/ATP carrier             | At4g01100 | ADNT1        | NP_192019.1 |
|                     | Peroxisomal AMP/ATP carrier | At3g05290 | PNC1         | NP_566251.1 |
| At5g27520           |                             | PNC2      | NP_198104.1  |             |
| Peroxisomal carrier | At2g39970                   |           | NP_181526.1  |             |

| Species              | Function                            | Gene | Protein name | Acc. Number    |
|----------------------|-------------------------------------|------|--------------|----------------|
| <i>D. discoideum</i> | ADP/ATP carrier                     |      | AncA         | XP_647166.1    |
|                      | ATP-Mg/Pi carrier                   |      | McfC         | XP_001733022.1 |
|                      | Putative adenine nucleotide carrier |      | McfA         | XP_635136.1    |
|                      | Putative adenine nucleotide carrier |      | McfV         | XP_643352.1    |
|                      | CoA carrier                         |      | McfP         | XP_629781.1    |
|                      |                                     |      | McfR         | XP_638883.1    |
|                      | Ypr011c-like carrier                |      | McfB         | XP_638149.1    |
|                      | Peroxisomal AMP/ATP                 |      | McfQ         | XP_645160.1    |

| Species          | Function          | Gene         | Name | Acc. Number |
|------------------|-------------------|--------------|------|-------------|
| <i>T. brucei</i> | ADP/ATP carrier   | Tb10.61.1830 | MCP5 | XP_827960.1 |
|                  | ATP-Mg/Pi carrier | Tb927.4.1660 | MCP6 | XP_844316.1 |
|                  | CoA carrier       | Tb10.70.2290 | MCP4 | XP_822738.1 |

| Species              | Function          | Gene | Protein name | Acc. Number    |
|----------------------|-------------------|------|--------------|----------------|
| <i>P. falciparum</i> | ADP/ATP carrier   |      |              | CAA58541.1     |
|                      | ATP-Mg/Pi carrier |      |              | XP_001351960.1 |

Table S3 (continued)

| Species               | Function                                           | Gene | Protein name | Acc. Number    |
|-----------------------|----------------------------------------------------|------|--------------|----------------|
| <i>N. ovalis</i>      | Hydrogenosomal ADP/ATP carrier                     |      |              | AAM97609.1     |
| <i>N. frontalis</i>   | Hydrogenosomal ADP/ATP carrier                     |      |              | AAN04660.1     |
| <i>B. hominis</i>     | Putative hydrogenosomal SLC25A43-like carrier      |      |              | CBK23107.2     |
|                       | Putative hydrogenosomal CoA carrier                |      |              | CBK24530.2     |
|                       | Putative hydrogenosomal ATP-Mg/Pi carrier          |      |              | CBK20638.2     |
| <i>T. vaginalis</i>   | Hydrogenosomal adenine nucleotide carrier          |      | HMP31        | XP_001582728.1 |
| <i>E. histolytica</i> | Mitosomal adenine nucleotide carrier               |      |              | AAK69775.1     |
| <i>T. pyriformis</i>  | Putative hydrogenosomal adenine nucleotide carrier |      |              | ABW76101.1     |
| <i>P. lanterna</i>    | Putative hydrogenosomal adenine nucleotide carrier |      |              | ACZ97597.1     |
| <i>A. locustae</i>    | Mitosomal adenine nucleotide carrier               |      |              | AAZ27416.2     |
| <i>E. cuniculi</i>    | Plasma membrane ADP/ATP carrier                    |      | ecNTT1       | ABW20407.1     |
|                       | Plasma membrane ADP/ATP carrier                    |      | ecNTT2       | ABW20408.1     |
|                       | Mitosomal ADP/ATP carrier                          |      | ecNTT3       | ABW20409.1     |
|                       | Plasma membrane ADP/ATP carrier                    |      | ecNTT4       | ABW20410.1     |

| Species            | Function                                             | Locus     | Protein name | Acc. Number    |
|--------------------|------------------------------------------------------|-----------|--------------|----------------|
| <i>A. thaliana</i> | Thylakoid ADP/ATP carrier                            | At5g01500 | TAAC         | NP_195770.1    |
|                    | Unknown                                              | At3g51870 |              | NP_190755.2    |
|                    | Adenine nucleotide uniporter in the plastid envelope | At4g32400 | AtBT1        | NP_194966.1    |
|                    | Unknown                                              | At3g20240 |              | NP_188659.1    |
|                    | ADP/ATP carrier in the plastid envelope              | At1g80300 | AATP1        | NP_178146      |
|                    |                                                      | At1g15500 | AATP2        | CAA64329.1     |
|                    | Endoplasmic reticulum ADP/ATP carrier                | At5g17400 | ER-ANT       | NP_568345.1    |
|                    | Unknown                                              | At5g56450 |              | NP_200456.1    |
| <i>Z. mays</i>     | ADP-Glucose/ADP carrier in the plastid envelope      |           | ZmBT1-1      | ACF78275.1     |
|                    | Adenine nucleotide uniporter in the plastid envelope |           | ZmBT1-2      | NP_001159268.1 |

Table S3 (continued)

| <b>Species</b>      | <b>Function</b>                      | <b>Gene</b> | <b>Protein name</b> | <b>Acc. Number</b>                                 |
|---------------------|--------------------------------------|-------------|---------------------|----------------------------------------------------|
| <i>P. infestans</i> | Putative CoA carrier                 |             |                     | XP_002897719.1                                     |
| <i>N. gruberi</i>   | Ypr011c-like carrier                 |             |                     | XP_002674890                                       |
| <i>P. infestans</i> | Ypr011c-like carrier                 |             |                     | XP_002901049.1                                     |
| <i>N. vectensis</i> | Ypr011c-like carrier                 |             |                     | XP_001626526.1                                     |
| <i>N. gruberi</i>   | Putative peroxisomal AMP/ATP carrier |             |                     | XP_002678224.1                                     |
| <i>P. infestans</i> | Putative peroxisomal AMP/ATP carrier |             |                     | XP_002900592.1<br>XP_002902667.1<br>XP_002909633.1 |
| <i>P. infestans</i> | SLC25A43-like carrier                |             |                     | XP_002895040.1                                     |
| <i>N. vectensis</i> | SLC25A43-like carrier                |             |                     | XP_001627437.1                                     |
| <i>B. floridae</i>  | SLC25A43-like carrier                |             |                     | XP_002611712.1                                     |

**Table S3 (continued)**
